# Supplementary material
Source: publisher site journal article supplement (https://www.dovepress.com/article/131538)

## Supplementary materials

### Design, synthesis, and anti-melanogenic effects of (2-substituted phenyl-1,3-dithiolan-4-yl)methanol (PDTM) derivatives

Do Hyun Kim<sup>1</sup>, Su Jeong Kim<sup>1</sup>, Sultan Ullah<sup>1</sup>, Hwi Young Yun<sup>1</sup>, Pusoon Chun<sup>2,\*</sup>, Hyung Ryong Moon<sup>1,\*</sup>

<sup>1</sup>College of Pharmacy, Pusan National University, Busan 609-735, Republic of Korea

<sup>2</sup>College of Pharmacy, Inje University, 197 Inje-ro, Gimhae, Gyeongnam, 621-749, Republic

#### 4-(4-(Hydroxymethyl)-1,3-dithiolan-2-yl)phenol (PDTM1)

Diastereomeric mixture of 1:1.2; yellow solid (58%); <sup>1</sup>H NMR (500 MHz, DMSO-*d*<sub>6</sub>)  $\delta$  9.49 (s, 1H, OH), 9.45 (s, 1H, OH), 7.31 – 7.27 (m, 4H, Ar), 6.69 – 6.66 (m, 4H, Ar), 5.64 (s, 2H, 2-H), 5.16 (brs, 1H, OH), 5.10 (brs, 1H, OH), 4.00 (m, 1H, 4-H), 3.73 (m, 1H, 4-H), 3.67 (t, 1H, *J* = 9.5 Hz), 3.51 (t, 1H, *J* = 10.0 Hz), 3.46 – 3.40 (m, 4H), 3.28 – 3.25 (m, 2H); <sup>13</sup>C NMR (125 MHz, DMSO-*d*<sub>6</sub>)  $\delta$  157.8, 157.5, 131.0, 129.8, 129.4, 128.1, 115.6, 115.5, 64.1, 63.5, 58.4, 57.4, 56.2, 54.6, 41.0, 40.7; LRMS (ESI-) *m/z* 227 (M-H)<sup>-</sup>; HRMS (ESI+) *m/z* C<sub>10</sub>H<sub>13</sub>O<sub>2</sub>S<sub>2</sub> (M+H)<sup>+</sup> calcd 229.0357, obsd 229.0350.

#### 4-(4-(Hydroxymethyl)-1,3-dithiolan-2-yl)benzene-1,2-diol (PDTM2)

Diastereomeric mixture of 1:1; redish sticky oil (86%); <sup>1</sup>H NMR (400 MHz, DMSO-*d*<sub>6</sub>)  $\delta$  9.02 (s, 1H, OH), 8.98 (s, 2H, OH), 8.95 (s, 1H, OH), 6.94 (d, 1H, *J* = 1.6 Hz, 2'-H), 6.91 (d, 1H, *J* = 2.0 Hz, 2'-H), 6.73 – 6.69 (m, 2H, 6'-H), 6.60 (d, 1H, *J* = 8.0 Hz, 5'-H), 6.59 (d, 1H, *J* = 8.4 Hz, 5'-H), 5.57 (s, 1H, 2-H), 5.56 (s, 1H, 2-H), 5.19 (t, 1H, *J* = 6.4 Hz, OH), 5.13 (t, 1H, *J* = 6.4 Hz, OH), 3.97 (m, 1H, 4-H), 3.73 – 3.63 (m, 2H), 3.53 – 3.39 (m, 5H), 3.26 – 3.21 (m, 2H); <sup>13</sup>C NMR (125 MHz, DMSO-*d*<sub>6</sub>)  $\delta$  145.9, 145.6, 145.6, 145.5, 131.3, 128.6, 119.7, 119.2, 115.7, 115.5, 115.5, 115.4, 64.2, 63.5, 58.4, 57.2, 56.5, 54.9, 40.9, 40.7; LRMS (ESI+) *m/z* 299 (M+MeOH+Na)<sup>+</sup>; HRMS (ESI+) *m/z* C<sub>10</sub>H<sub>12</sub>NaO<sub>3</sub>S<sub>2</sub> (M+Na)<sup>+</sup> calcd 267.0126, obsd 267.0117.

#### 4-(4-(Hydroxymethyl)-1,3-dithiolan-2-yl)benzene-1,3-diol (PDTM3)

Diastereomeric mixture of 1:1.1; yellowish sticky oil (33%); <sup>1</sup>H NMR (400 MHz, CD<sub>3</sub>OD)  $\delta$  7.45 (d, 1H, *J* = 8.8 Hz, 6'-H), 7.40 (d, 1H, *J* = 8.4 Hz, 6'-H), 6.26 (dd, 1H, *J* = 8.4, 2.4 Hz, 5'-H), 6.25 (dd, 1H, *J* = 8.4, 2.4 Hz, 5'-H), 6.22 (d, 2H, *J* = 2.4 Hz, 3'-H), 6.04 (s, 1H, 2-H), 5.95 (s, 1H, 2-H), 3.99 (m, 1H, 4-H), 3.83 (dd, 1H, *J* = 10.8, 9.6 Hz), 3.75 (m, 1H), 3.68 (dd, 1H, *J* = 11.2, 8.8 Hz), 3.59 – 3.54 (m, 2H), 3.44 – 3.36 (m, 2H), 3.31 – 3.26 (m, 2H); <sup>13</sup>C NMR (125 MHz, DMSO-*d*<sub>6</sub>)  $\delta$  158.4, 158.2, 156.1, 155.6, 129.9, 129.5, 117.4, 114.4, 107.3, 107.0, 102.4, 102.4, 64.2, 63.6, 57.7, 56.9, 49.4, 48.2, 40.5, 40.3; LRMS (ESI+) *m/z* 267 (M+Na)<sup>+</sup>, 299 (M+MeOH+Na)<sup>+</sup>; HRMS (ESI-) *m/z* C<sub>10</sub>H<sub>11</sub>O<sub>3</sub>S<sub>2</sub> (M-H)<sup>-</sup> calcd 243.0155, obsd 243.0174.

#### 4-(4-(Hydroxymethyl)-1,3-dithiolan-2-yl)-2-methoxyphenol (PDTM4)

Diastereomeric mixture of 1:1; yellow solid (20%);  $^1\text{H}$  NMR (500 MHz,  $\text{CDCl}_3+\text{D}_2\text{O}$ )  $\delta$  7.09 (d, 1H,  $J = 2.0$  Hz, 2'-H), 7.08 (d, 1H,  $J = 1.5$  Hz, 2'-H), 7.01 (dd, 1H,  $J = 8.5, 2.0$  Hz, 6'-H), 6.99 (dd, 1H,  $J = 8.0, 2.0$  Hz, 6'-H), 6.83 (d, 2H,  $J = 8.0$  Hz, 5'-H), 5.65 (s, 1H, 2-H), 5.62 (s, 1H, 2-H), 4.17 (td, 1H,  $J = 11.0, 6.0$  Hz, 4-H), 3.97 – 3.89 (m, 2H), 3.90 (s, 3H, OMe), 3.89 (s, 3H, OMe), 3.80 – 3.76 (m, 2H), 3.72 (dd, 1H,  $J = 11.5, 6.0$  Hz), 3.53 (dd, 1H,  $J = 12.5, 6.0$  Hz), 3.46 (dd, 1H,  $J = 13.0, 2.5$  Hz), 3.37 (dd, 1H,  $J = 12.5, 5.0$  Hz), 3.32 (dd, 1H,  $J = 12.5, 5.0$  Hz);  $^{13}\text{C}$  NMR (150 MHz,  $\text{CDCl}_3$ )  $\delta$  146.5, 146.5, 145.8, 145.7, 129.9, 127.5, 121.3, 121.1, 114.3, 114.1, 110.4, 110.2, 65.0, 63.6, 58.7, 57.4, 57.2, 56.1, 56.0, 55.9, 41.3, 40.7; LRMS (ESI+)  $m/z$  279 (M+K- $\text{H}_2\text{O}$ ) $^+$ , 297 (M+K) $^+$ ; HRMS (ESI+)  $m/z$   $\text{C}_{11}\text{H}_{14}\text{NaO}_3\text{S}_2$  (M+Na) $^+$  calcd 281.0282, obsd 281.0275.

### **2-Ethoxy-4-(4-(hydroxymethyl)-1,3-dithiolan-2-yl)phenol (PDTM5)**

Diastereomeric mixture of 1:1.2; beige-colored solid (18%);  $^1\text{H}$  NMR (500 MHz,  $\text{CDCl}_3$ )  $\delta$  7.07 (d, 1H,  $J = 2.0$  Hz, 2'-H), 7.06 (d, 1H,  $J = 2.0$  Hz, 2'-H), 6.99 (dd, 1H,  $J = 8.0, 2.5$  Hz, 6'-H), 6.97 (dd, 1H,  $J = 8.5, 2.0$  Hz, 6'-H), 6.83 (d, 2H,  $J = 8.0$  Hz, 5'-H), 5.77 (brs, 2H, OH), 5.63 (s, 1H, 2-H), 5.60 (s, 1H, 2-H), 4.14 (m, 1H, 4-H), 4.12 (q, 4H,  $J = 7.0$  Hz,  $\text{CH}_2\text{CH}_3$ ), 3.95 (dd, 1H,  $J = 10.0, 8.0$  Hz), 3.91 (m, 1H), 3.80 – 3.76 (m, 2H), 3.71 (dd, 1H,  $J = 11.0, 6.0$  Hz), 3.52 (dd, 1H,  $J = 11.5, 5.5$  Hz), 3.45 (dd, 1H,  $J = 12.5, 3.0$  Hz), 3.36 (dd, 1H,  $J = 13.0, 5.5$  Hz), 3.32 (dd, 1H,  $J = 12.0, 5.5$  Hz), 2.06 (brs, 2H, OH), 1.44 (t, 6H,  $J = 7.0$  Hz,  $\text{CH}_2\text{CH}_3$ );  $^{13}\text{C}$  NMR (125 MHz,  $\text{CDCl}_3$ )  $\delta$  145.9, 145.8, 145.8, 145.8, 130.6, 129.1, 121.2, 120.9, 114.1, 114.0, 111.3, 111.1, 65.0, 64.5, 64.5, 63.6, 58.7, 57.4, 57.2, 55.9, 41.3, 40.7, 14.8, 14.8; LRMS (ESI+)  $m/z$  311 (M+K) $^+$ ; HRMS (ESI+)  $m/z$   $\text{C}_{10}\text{H}_{17}\text{O}_3\text{S}_2$  (M+H) $^+$  calcd 273.0619, obsd 273.0611.

### **5-(4-(Hydroxymethyl)-1,3-dithiolan-2-yl)-2-methoxyphenol (PDTM6)**

Obtained as a single diastereomer; white solid (24%);  $^1\text{H}$  NMR (400 MHz,  $\text{DMSO}-d_6$ )  $\delta$  9.04 (s, 1H, OH), 6.94 (d, 1H,  $J = 2.0$  Hz, 2'-H), 6.83 (dd, 1H,  $J = 8.0, 1.6$  Hz, 6'-H), 6.78 (d, 1H,  $J = 8.4$  Hz, 5'-H), 5.60 (s, 1H, 2-H), 5.13 (brt, 1H, OH), 3.98 (m, 1H, 4-H), 3.71 (s, 3H, OMe), 3.51 (m, 1H, OCHH), 3.42 (m, 1H, OCHH), 3.41 (dd, 1H,  $J = 12.0, 5.2$  Hz, 5-CHH), 3.26 (dd, 1H,  $J = 12.0, 4.8$  Hz, 5-CHH);  $^{13}\text{C}$  NMR (125 MHz,  $\text{DMSO}-d_6$ )  $\delta$  147.9 (C4'), 146.8 (C3'), 133.3 (C1'), 119.0 (C6'), 115.4 (C2'), 112.1 (C5'), 63.5 (C6), 58.4 (C4), 56.1 (OCH<sub>3</sub>), 54.6 (C2), 40.7 (C5); LRMS (ESI+)  $m/z$  297 (M+K) $^+$ ; HRMS (ESI+)  $m/z$   $\text{C}_{11}\text{H}_{15}\text{O}_3\text{S}_2$  (M+H) $^+$  calcd 259.0463, obsd 259.0454.

### **(2-(4-Methoxyphenyl)-1,3-dithiolan-4-yl)methanol (PDTM7)**

Diastereomeric mixture of 1:1.2; beige-colored solid (85%);  $^1\text{H}$  NMR (400 MHz,  $\text{CDCl}_3$ )  $\delta$  7.45 (d, 2H,  $J = 8.8$  Hz, Ar), 7.44 (d, 2H,  $J = 8.4$  Hz, Ar), 6.84 (d, 4H,  $J = 8.8$  Hz, Ar), 5.66 (s, 1H, 2-H), 5.62 (s, 1H, 2-H), 4.16 (td, 1H,  $J = 10.8, 6.0$  Hz, 4-H), 3.98 – 3.88 (m, 2H), 3.79 (s, 6H, OMe), 3.80 – 3.74 (m, 2H), 3.71 (dd, 1H,  $J = 11.2, 6.0$  Hz), 3.52 (dd, 1H,  $J = 12.0, 5.2$  Hz), 3.45 (dd, 1H,  $J = 12.8, 2.0$  Hz), 3.36 (dd, 1H,  $J = 12.8, 5.2$  Hz), 3.32 (dd, 1H,  $J = 12.0, 4.4$  Hz), 2.13 (s, 2H, OH);  $^{13}\text{C}$  NMR (125 MHz,  $\text{CDCl}_3$ )  $\delta$  159.6, 159.5, 131.3, 129.4, 129.4, 129.1, 114.0, 113.9, 65.0, 63.6, 58.7, 57.3, 56.9, 55.3, 55.3, 55.2, 41.3, 40.7; LRMS (ESI+)  $m/z$  281 (M+K) $^+$ ; HRMS (ESI+)  $m/z$   $\text{C}_{11}\text{H}_{15}\text{O}_2\text{S}_2$  (M+H) $^+$  calcd 243.0513, obsd 243.0503.

### **(2-(3,4-Dimethoxyphenyl)-1,3-dithiolan-4-yl)methanol (PDTM8)**

Diastereomeric mixture of 1:1; yellowish solid (64%);  $^1\text{H}$  NMR (400 MHz,  $\text{CDCl}_3$ )  $\delta$  7.09 – 7.02 (m, 4H, Ar), 6.77 (d, 2H,  $J = 8.0$  Hz, 5'-H), 5.65 (s, 1H, 2-H), 5.62 (s, 1H, 2-H),

4.17 (td, 1H,  $J = 10.8, 6.0$  Hz, 4-H), 3.98 – 3.90 (m, 2H), 3.89 (s, 3H, OMe), 3.88 (s, 3H, OMe), 3.86 (s, 6H, OMe), 3.81 – 3.76 (m, 2H), 3.72 (dd, 1H,  $J = 11.2, 6.4$  Hz), 3.52 (dd, 1H,  $J = 12.0, 5.2$  Hz), 3.46 (dd, 1H,  $J = 12.4, 2.4$  Hz), 3.37 (dd, 1H,  $J = 12.4, 4.8$  Hz), 3.33 (dd, 1H,  $J = 12.0, 4.8$  Hz), 2.02 (s, 2H, OH);  $^{13}\text{C}$  NMR (125 MHz,  $\text{CDCl}_3$ )  $\delta$  149.1, 149.0, 149.0, 148.9, 131.6, 130.0, 120.5, 120.2, 111.1, 110.9, 110.8, 110.7, 64.9, 63.6, 58.6, 57.2, 57.2, 55.9, 55.9, 55.9, 55.7, 41.3, 40.7; LRMS (ESI+)  $m/z$  295 (M+Na) $^+$ , 311 (M+K) $^+$ ; HRMS (ESI+)  $m/z$   $\text{C}_{12}\text{H}_{17}\text{O}_3\text{S}_2$  (M+H) $^+$  calcd 273.0619, obsd 273.0607.

#### **(2-(2,4-Dimethoxyphenyl)-1,3-dithiolan-4-yl)methanol (PDTM9)**

Diastereomeric mixture of 1:1.5; yellow solid (15%);  $^1\text{H}$  NMR (500 MHz,  $\text{CDCl}_3$ )  $\delta$  7.67 (d, 1H,  $J = 8.0$  Hz, 6'-H), 7.64 (d, 1H,  $J = 9.0$  Hz, 6'-H), 6.48 (dd, 1H,  $J = 8.0, 2.5$  Hz, 5'-H), 6.48 (dd, 1H,  $J = 8.5, 2.5$  Hz, 5'-H), 6.42 (d, 1H,  $J = 2.5$  Hz, 3'-H), 6.41 (d, 1H,  $J = 2.5$  Hz, 3'-H), 6.07 (s, 1H, 2-H), 5.98 (s, 1H, 2-H), 4.10 (m, 1H), 3.93 – 3.87 (m, 2H), 3.83 (s, 3H, OMe), 3.83 (s, 3H, OMe), 3.79 (s, 6H, OMe), 3.80 – 3.73 (m, 2H), 3.69 (dd, 1H,  $J = 11.0, 6.0$  Hz), 3.41 – 3.33 (m, 3H), 3.30 (dd, 1H,  $J = 12.0, 4.5$  Hz), 2.15 (s, 2H, OH);  $^{13}\text{C}$  NMR (100 MHz,  $\text{CDCl}_3$ )  $\delta$  160.9, 160.7, 158.1, 157.6, 129.5, 129.1, 121.1, 118.9, 104.9, 104.6, 98.7, 98.4, 65.1, 64.1, 58.0, 57.2, 55.9, 55.9, 55.7, 55.7, 49.8, 48.6, 41.0, 39.9; LRMS (ESI+)  $m/z$  271 (M+H-H $_2$ ) $^+$ ; HRMS (ESI+)  $m/z$   $\text{C}_{12}\text{H}_{17}\text{O}_3\text{S}_2$  (M+H) $^+$  calcd 273.0619, obsd 273.0609.

#### **2-(4-(Hydroxymethyl)-1,3-dithiolan-2-yl)phenol (PDTM10)**

Diastereomeric mixture of 1:1; red solid (79%);  $^1\text{H}$  NMR (400 MHz,  $\text{CD}_3\text{OD}$ )  $\delta$  7.67 (d, 1H,  $J = 8.0$  Hz, 6'-H), 7.66 (d, 1H,  $J = 7.6$  Hz, 6'-H), 7.07 – 7.03 (m, 2H, 4'-H), 6.81 – 6.77 (m, 2H, 5'-H), 6.74 (d, 1H,  $J = 8.0$  Hz, 3'-H), 6.74 (d, 1H,  $J = 8.4$  Hz, 3'-H), 6.09 (s, 2H, 2-H), 4.01 (m, 1H, 4-H), 3.87 – 3.77 (m, 4H), 3.62 – 3.59 (m, 2H), 3.42 (dd, 1H,  $J = 12.0, 3.2$  Hz), 3.33 – 3.28 (m, 2H);  $^{13}\text{C}$  NMR (125 MHz,  $\text{CDCl}_3$ )  $\delta$  155.2, 154.8, 130.3, 130.1, 130.1, 129.6, 122.2, 120.6, 120.5, 120.3, 117.3, 117.2, 65.1, 63.6, 58.4, 56.8, 54.8, 52.8, 41.3, 40.6; LRMS (ESI+)  $m/z$  227 (M+H-H $_2$ ) $^+$ ; HRMS (ESI+)  $m/z$   $\text{C}_{10}\text{H}_{12}\text{NaO}_2\text{S}_2$  (M+Na) $^+$  calcd 251.0176, obsd 251.0163.

#### **(2-(3,4,5-Trimethoxyphenyl)-1,3-dithiolan-4-yl)methanol (PDTM11)**

Diastereomeric mixture of 1:1.3; yellowish sticky oil (62%);  $^1\text{H}$  NMR (500 MHz,  $\text{CDCl}_3$ )  $\delta$  6.75 (s, 2H, 2'-H, 6'-H), 6.74 (s, 2H, 2'-H, 6'-H), 5.58 (s, 1H, 2-H), 5.56 (s, 1H, 2-H), 4.11 (m, 1H, 4-H), 3.94 – 3.84 (m, 2H), 3.83 (s, 6H, OMe), 3.82 (s, 6H, OMe), 3.79 (s, 6H, OMe), 3.76 – 3.72 (m, 2H), 3.68 (dd, 1H,  $J = 11.0, 6.0$  Hz), 3.48 (dd, 1H,  $J = 12.0, 5.0$  Hz), 3.44 (dd, 1H,  $J = 13.0, 3.5$  Hz), 3.32 (dd, 1H,  $J = 12.0, 5.5$  Hz), 3.31 (dd, 1H,  $J = 12.0, 5.0$  Hz), 2.53 (s, 2H, OH);  $^{13}\text{C}$  NMR (125 MHz,  $\text{CDCl}_3$ )  $\delta$  153.1, 153.1, 137.9, 137.7, 135.0, 133.5105.1, 104.9, 64.8, 63.6, 60.8, 60.8, 58.5, 57.4, 57.3, 56.1, 56.1, 56.0, 41.2, 40.7; LRMS (ESI+)  $m/z$  325 (M+Na) $^+$ , 341 (M+K) $^+$ , 357 (M+MeOH+Na) $^+$ ; HRMS (ESI+)  $m/z$   $\text{C}_{13}\text{H}_{19}\text{O}_4\text{S}_2$  (M+H) $^+$  calcd 303.0725, obsd 303.0712.

#### **4-(4-(Hydroxymethyl)-1,3-dithiolan-2-yl)-2,6-dimethoxyphenol (PDTM12)**

Obtained as a single diastereomer; beige-colored solid (34%);  $^1\text{H}$  NMR (400 MHz,  $\text{DMSO}-d_6$ )  $\delta$  8.42 (s, 1H, OH), 6.75 (s, 2H, 2'-H, 6'-H), 5.65 (s, 1H, 2-H), 5.13 (t, 1H,  $J = 5.6$  Hz, OH), 4.02 (m, 1H, 4-H), 3.71 (s, 6H, OMe), 3.54 – 3.39 (m, 3H,  $\text{OCH}_2$ , 5- $\text{CHH}$ ), 3.27 (dd, 1H,  $J = 12.0, 4.8$  Hz, 5- $\text{CHH}$ );  $^{13}\text{C}$  NMR (125 MHz,  $\text{DMSO}-d_6$ )  $\delta$  148.0 (C3', C5'), 135.7 (C4'), 130.7 (C1'), 105.6 (C2', C6'), 63.5 (C6), 58.3 (C4), 56.2 (2\* $\text{OCH}_3$ ), 55.3 (C2), 40.6 (C5); LRMS (ESI+)  $m/z$  287 (M+H-H $_2$ ) $^+$ , 309 (M+K-H $_2\text{O}$ ) $^+$ ; HRMS (ESI+)  $m/z$   $\text{C}_{12}\text{H}_{17}\text{O}_4\text{S}_2$  (M+H) $^+$  calcd 289.0568, obsd 289.0556.

### 2-Bromo-4-(4-(hydroxymethyl)-1,3-dithiolan-2-yl)phenol (PDTM13)

Obtained as a single diastereomer; yellow solid (39%);  $^1\text{H}$  NMR (400 MHz, DMSO- $d_6$ )  $\delta$  10.40 (brs, 1H, OH), 7.59 (d, 1H,  $J = 2.4$  Hz, 2'-H), 7.31 (dd, 1H,  $J = 8.4, 2.4$  Hz, 6'-H), 6.87 (d, 1H,  $J = 8.4$  Hz, 5'-H), 5.64 (s, 1H, 2-H), 5.22 (brt, 1H,  $J = 5.6$  Hz, OH), 3.75 (m, 1H, 4-H), 3.66 (m, 1H, OCHH), 3.44 (m, 1H, OCHH), 3.41 (dd, 1H,  $J = 12.0, 3.6$  Hz, 5-CHH), 3.26 (dd, 1H,  $J = 12.0, 5.2$  Hz, 5-CHH);  $^{13}\text{C}$  NMR (125 MHz, DMSO- $d_6$ )  $\delta$  154.4 (C4'), 132.7 (C2'), 130.8 (C1'), 129.0 (C6'), 116.6 (C5'), 109.3 (C3'), 64.0 (C6), 57.8 (C4), 55.0 (C2), 41.1 (C5); LRMS (ESI+)  $m/z$  344 (M+K) $^+$ , 346 (M+2+K) $^+$ ; HRMS (ESI-)  $m/z$  C<sub>10</sub>H<sub>10</sub>BrO<sub>2</sub>S<sub>2</sub> (M-H) $^-$  calcd 304.9306, obsd 304.9311.

### 2,6-Dibromo-4-(4-(hydroxymethyl)-1,3-dithiolan-2-yl)phenol (PDTM14)

Diastereomeric mixture of 1:1.1; yellow solid (36%);  $^1\text{H}$  NMR (400 MHz, DMSO- $d_6$ )  $\delta$  10.09 (s, 1H, OH), 10.02 (s, 1H, OH), 7.65 (s, 2H, 2'-H, 6'-H), 7.62 (s, 2H, 2'-H, 6'-H), 5.66 (s, 1H, 2-H), 5.65 (s, 1H, 2-H), 5.20 (brs, 2H, OH), 4.03 (m, 1H, 4-H), 3.79 (m, 1H, 4-H), 3.66 (dd, 1H,  $J = 10.4, 8.4$  Hz), 3.52 – 3.36 (m, 5H), 3.30 (dd, 1H,  $J = 12.0, 4.4$  Hz), 3.27 (dd, 1H,  $J = 12.0, 5.6$  Hz);  $^{13}\text{C}$  NMR (125 MHz, DMSO- $d_6$ )  $\delta$  151.0, 150.7, 136.1, 133.3, 132.1, 131.7, 111.8, 111.7, 64.0, 63.2, 58.4, 58.0, 57.5, 56.8, 41.1, 40.6; HRMS (ESI-)  $m/z$  C<sub>10</sub>H<sub>9</sub>Br<sub>2</sub>O<sub>2</sub>S<sub>2</sub> (M-H) $^-$  calcd 382.8411, obsd 382.8418.

### 4-(4-(Hydroxymethyl)-1,3-dithiolan-2-yl)-2-methylphenol (PDTM15)

Obtained as a single diastereomer; yellow solid (39%);  $^1\text{H}$  NMR (400 MHz, DMSO- $d_6$ )  $\delta$  9.43 (brs, 1H, OH), 7.18 (d, 1H,  $J = 2.0$  Hz, 2'-H), 7.12 (dd, 1H,  $J = 8.4, 2.0$  Hz, 6'-H), 6.67 (d, 1H,  $J = 8.4$  Hz, 5'-H), 5.59 (s, 1H, 2-H), 5.19 (brt, 1H,  $J = 5.6$  Hz, OH), 3.74 – 3.63 (m, 2H, 4-H, OCHH), 3.43 – 3.33 (m, 2H, OCHH, 5-CHH), 3.23 (dd, 1H,  $J = 12.4, 5.6$  Hz, 5-CHH), 2.06 (s, 3H, Me);  $^{13}\text{C}$  NMR (125 MHz, DMSO- $d_6$ )  $\delta$  155.9 (C4'), 130.8 (C1'), 127.8 (C2'), 127.0 (C6'), 124.3 (C3'), 114.8 (C5'), 64.1 (C6'), 57.3 (C4'), 56.3 (C2'), 41.0 (C5'), 16.4 (CH<sub>3</sub>); LRMS (ESI+)  $m/z$  241 (M+H-H<sub>2</sub>) $^+$ , 281 (M+K) $^+$ ; HRMS (ESI+)  $m/z$  C<sub>11</sub>H<sub>15</sub>O<sub>2</sub>S<sub>2</sub> (M+H) $^+$  calcd 243.0513, obsd 243.0507.

### 4-(4-(Hydroxymethyl)-1,3-dithiolan-2-yl)-2,6-dimethylphenol (PDTM16)

Diastereomeric mixture of 1:1.5; yellow solid (42%);  $^1\text{H}$  NMR (400 MHz, DMSO- $d_6$ )  $\delta$  8.34 (s, 1H, OH), 8.29 (s, 1H, OH), 7.03 (s, 2H, 2'-H, 6'-H), 7.01 (s, 2H, 2'-H, 6'-H), 5.56 (s, 2H, 2-H), 5.19 (t, 1H,  $J = 5.6$  Hz, OH), 5.13 (t, 1H,  $J = 5.6$  Hz, OH), 3.99 (m, 1H, 4-H), 3.74 – 3.62 (m, 3H), 3.53 – 3.89 (m, 4H), 3.25 (dd, 1H,  $J = 11.6, 5.2$  Hz), 3.23 (dd, 1H,  $J = 12.0, 5.6$  Hz), 2.10 (s, 12H, Me);  $^{13}\text{C}$  NMR (125 MHz, DMSO- $d_6$ )  $\delta$  153.6, 153.3, 130.8, 128.4, 128.1, 128.0, 124.5, 124.4, 64.1, 63.5, 58.4, 57.3, 56.4, 54.7, 41.0, 40.8, 17.0, 17.0; LRMS (ESI+)  $m/z$  255 (M+H-H<sub>2</sub>) $^+$ , 295 (M+K) $^+$ ; HRMS (ESI+)  $m/z$  C<sub>12</sub>H<sub>17</sub>O<sub>2</sub>S<sub>2</sub> (M+H) $^+$  calcd 257.0670, obsd 257.0663.

### 2,6-Di-*tert*-butyl-4-(4-(hydroxymethyl)-1,3-dithiolan-2-yl)phenol (PDTM17)

Diastereomeric mixture of 1:1.4; yellowish solid (59%);  $^1\text{H}$  NMR (400 MHz, CDCl<sub>3</sub>)  $\delta$  7.33 (s, 4H, 2'-H, 6'-H), 5.67 (s, 1H, 2-H), 5.64 (s, 1H, 2-H), 5.26 (brs, 2H, OH), 4.17 (m, 1H, 4-H), 3.98 (dd, 1H,  $J = 10.4, 8.0$  Hz), 3.91 (m, 1H, 4-H), 3.81 – 3.76 (m, 2H), 3.72 (dd, 1H,  $J = 10.8, 6.0$  Hz), 3.54 (dd, 1H,  $J = 12.0, 5.6$  Hz), 3.46 (dd, 1H,  $J = 12.4, 2.4$  Hz), 3.37 (dd, 1H,  $J = 12.4, 5.2$  Hz), 3.32 (dd, 1H,  $J = 12.0, 5.2$  Hz), 2.14 (brs, 2H, OH), 1.41 (s, 36H, *t*-Bu);  $^{13}\text{C}$  NMR (125 MHz, CDCl<sub>3</sub>)  $\delta$  153.9, 153.8, 135.9, 135.9, 129.0, 127.7, 125.0, 124.8, 65.0,

63.6, 58.6, 57.9, 57.1, 56.5, 41.3, 40.7, 34.4, 34.4, 30.2, 30.2; LRMS (ESI+)  $m/z$  341 (M+H)<sup>+</sup>, 363 (M+Na)<sup>+</sup>, 379 (M+K)<sup>+</sup>, 395 (M+MeOH+Na)<sup>+</sup>; HRMS (ESI+)  $m/z$  C<sub>18</sub>H<sub>29</sub>O<sub>2</sub>S<sub>2</sub> (M+H)<sup>+</sup> calcd 341.1609, obsd 341.1600.

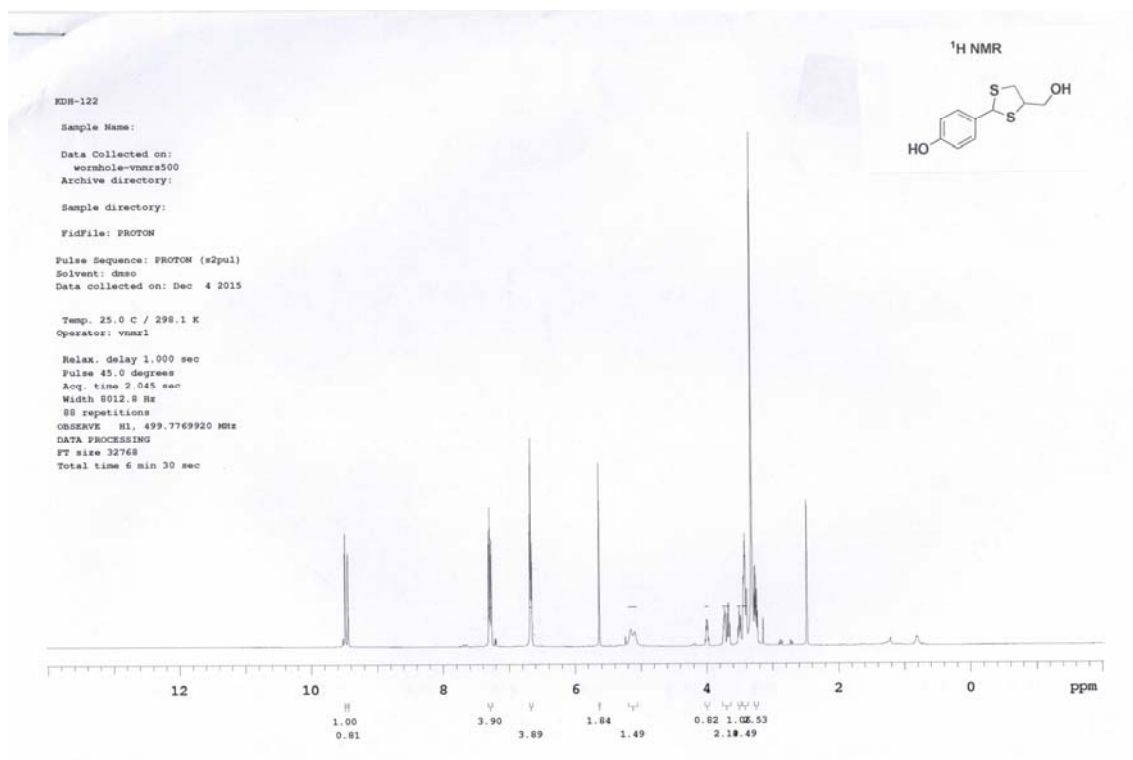

KDH-122

Sample Name:

Data Collected on:  
wormhole-vnmr500

Archive directory:

Sample directory:

FidFile: 2015-12-15-KDH-122-C13

Pulse Sequence: CARDCN (s2pul)  
Solvent: dmsc  
Data collected on: Dec 15 2015

Temp. 25.0 C / 298.1 K  
Operator: vnmr1

Relax. delay 1.000 sec  
Pulse 45.0 degrees  
Acq. time 1.049 sec  
Width 31250.0 Hz  
34112 repetitions  
OBSERVE C13, 125.6690246 MHz  
DECOUPLE H1, 499.7794909 MHz  
Power 38 dB  
continuously on  
WALTZ-16 modulated  
DATA PROCESSING  
Line broadening 0.5 Hz  
FT size 65536  
Total time 28 hr, 27 min

<sup>13</sup>C NMR

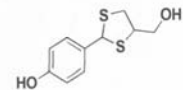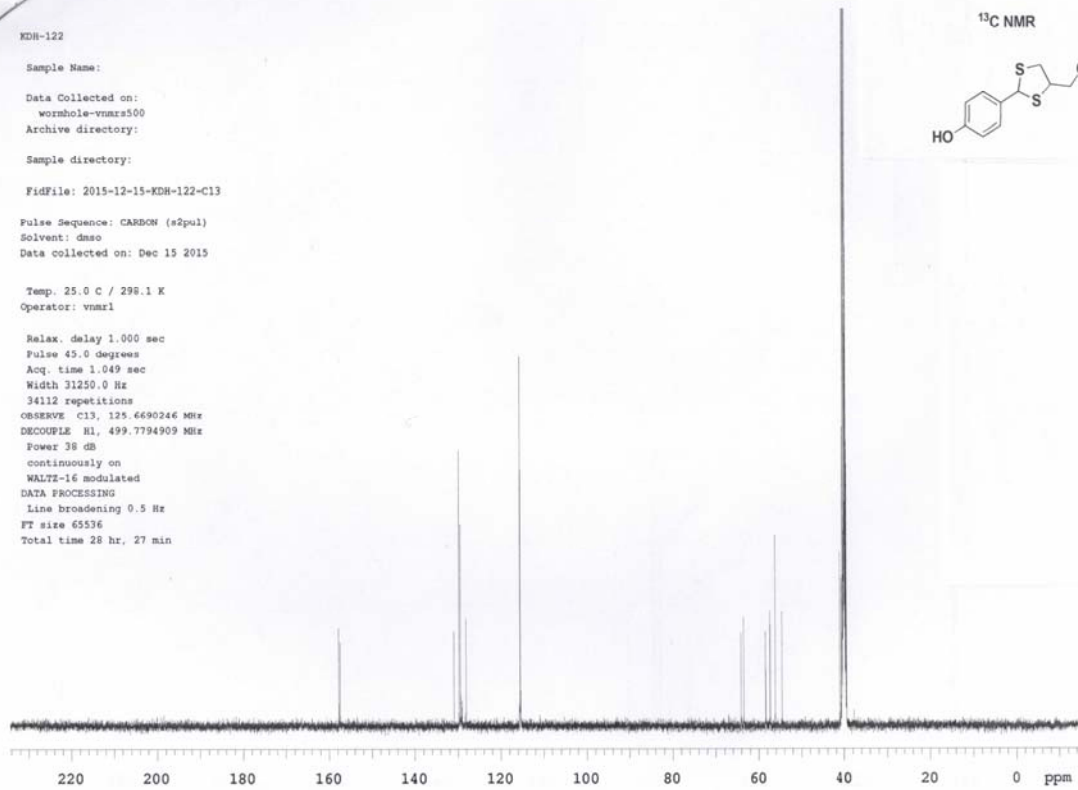

220 200 180 160 140 120 100 80 60 40 20 0 ppm

KDH-125

Pulse Sequence: s2pul  
Solvent: DMSO  
Ambient Temperature  
File: KDH-125  
INDVA-400 "varian"

Relax. delay 2.000 sec  
Pulse 45.0 degrees  
Acq. time 3.748 sec  
Width 8000.0 Hz  
18 repetitions  
OBSERVE H1, 399.9655615 MHz  
DATA PROCESSING  
FT size 65536  
Total time 7 hr, 59 min, 24 sec

<sup>1</sup>H NMR

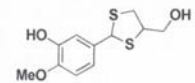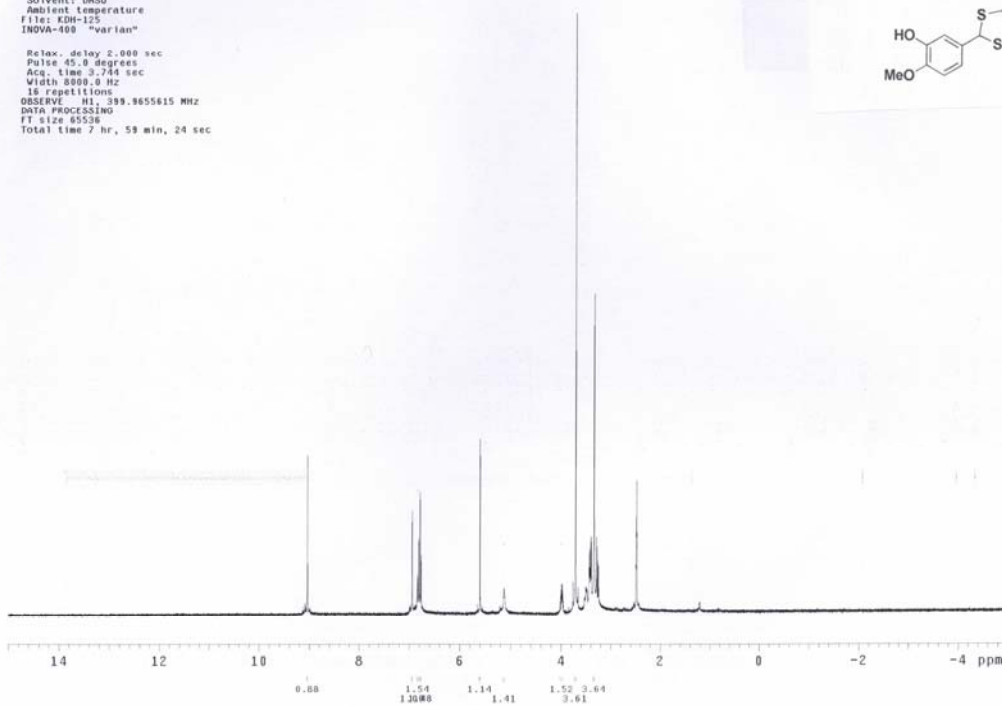

14 12 10 8 6 4 2 0 -2 -4 ppm

0.00 1.54 1.14 1.41 1.52 3.64

KDH-125  
Sample Name:  
Data Collected on:  
wormhole-vnmr500  
Archive directory:  
Sample directory:  
FidFile: 2016-04-26-KDH-125-C13  
Pulse Sequence: CARBON (s2pul)  
solvent: dmsd  
Data collected on: Apr 26 2016

Temp. 25.0 C / 298.1 K  
Operator: vnmr1

Relax. delay 1.000 sec  
Pulse 45.0 degrees  
Acq. time 1.049 sec  
Width 31250.0 Hz  
32192 repetitions  
OBSERVE C13, 125.6683694 MHz  
DECOUPLE H1, 499.7768952 MHz  
Power 38 dB  
continuously on  
WALTZ-16 modulated  
DATA PROCESSING  
Line broadening 3.0 Hz  
FT size 65536  
Total time 22 hr, 45 min

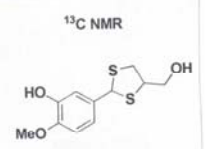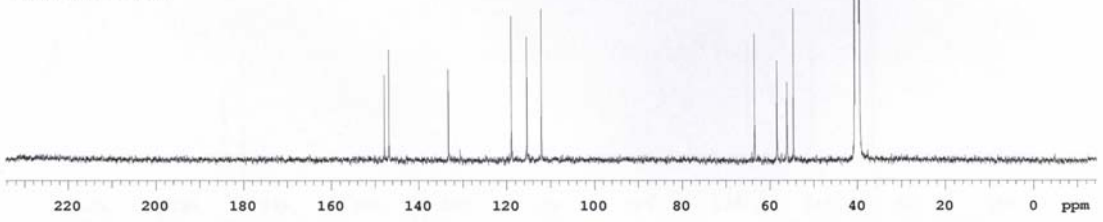

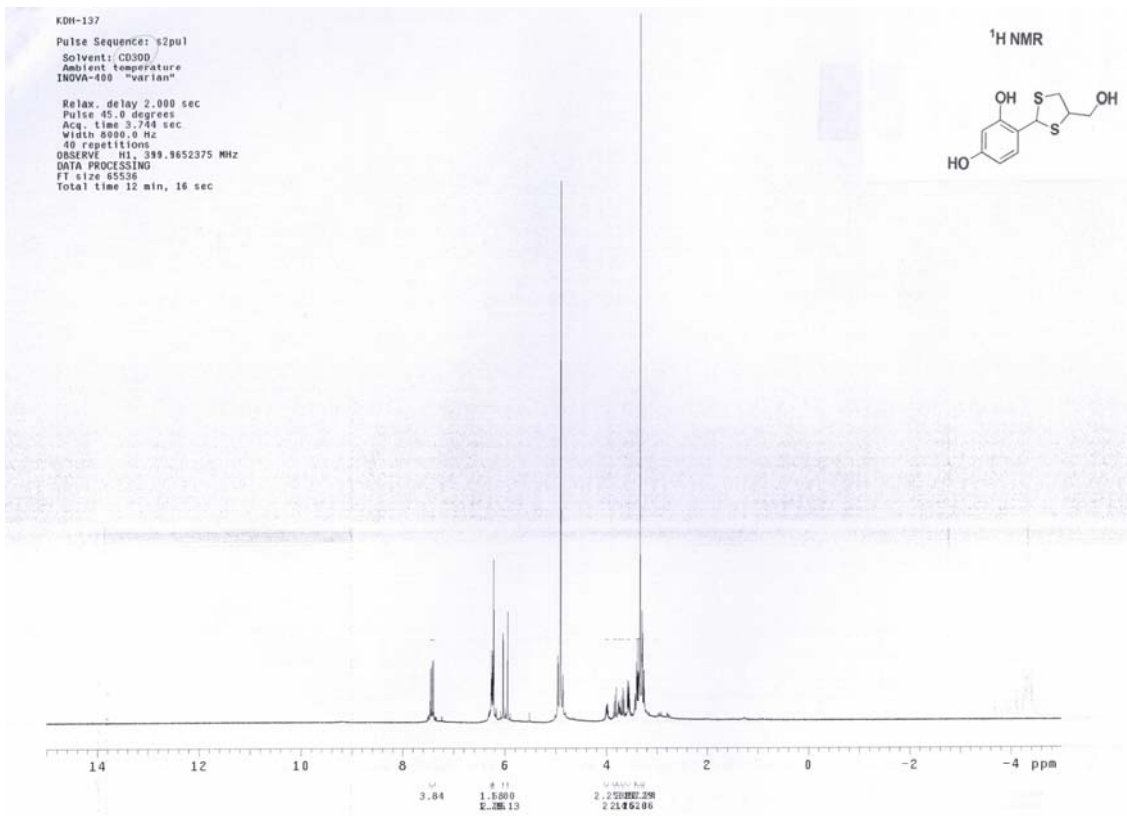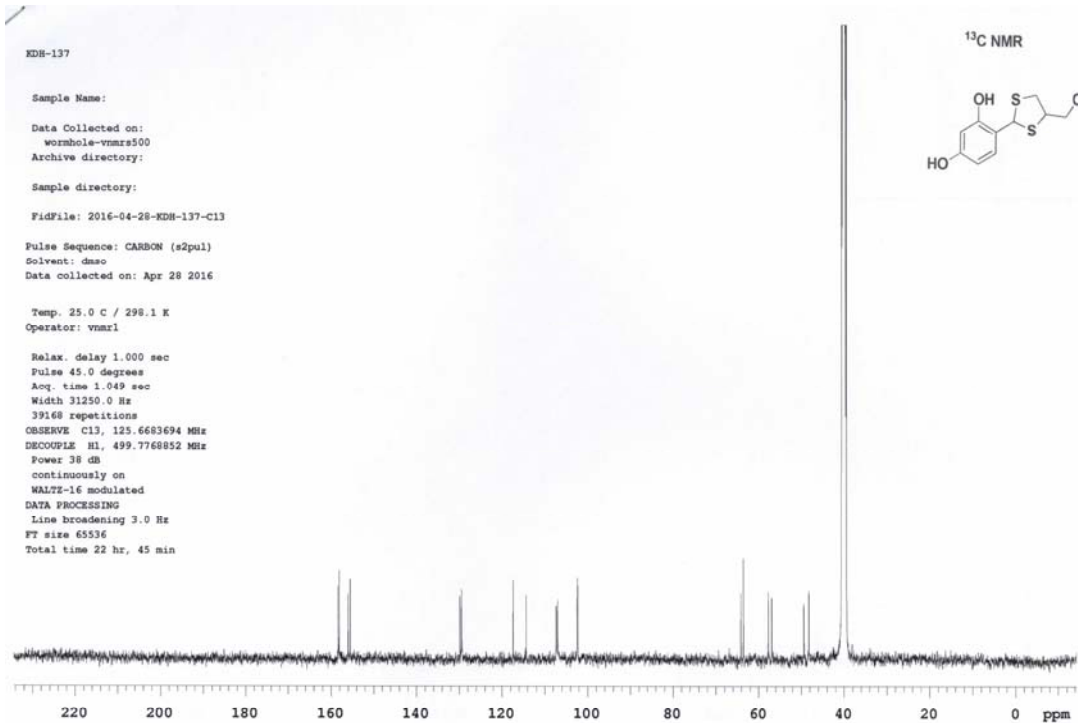



KDH-122

Sample Name:

Data Collected on:  
wormhole-vmrz500  
Archive directory:

Sample directory:

FidFile: 2015-12-16-KDH-122-gCOSY

Pulse Sequence: gCOSY  
Solvent: dmsc  
Data collected on: Dec 16 2015

Temp. 25.0 C / 298.1 K  
Operator: vmr1

Relax. delay 1.000 sec  
Acq. time 0.150 sec  
Width 8012.8 Hz  
2D Width 8012.8 Hz  
128 repetitions  
128 increments  
OBSERVE H1, 499.7769925 MHz  
DATA PROCESSING  
Sq. sine bell 0.075 sec  
F1 DATA PROCESSING  
Sq. sine bell 0.016 sec  
FT size 4096 x 4096  
Total time 5 hr, 24 min

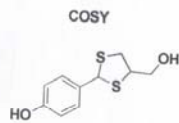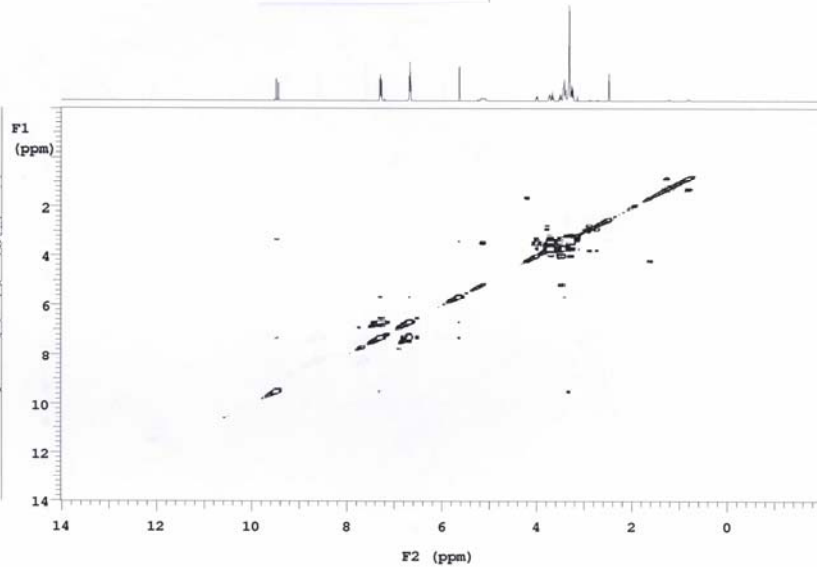

KDH-122

Sample Name:

Data Collected on:  
wormhole-vmrz500  
Archive directory:

Sample directory:

FidFile: 2015-12-16-KDH-122-gHSQCAD

Pulse Sequence: gHSQCAD  
Solvent: dmsc  
Data collected on: Dec 16 2015

Temp. 25.0 C / 298.1 K  
Operator: vmr1

Relax. delay 1.000 sec  
Acq. time 0.150 sec  
Width 8012.8 Hz  
2D Width 25133.5 Hz  
128 repetitions  
2 x 128 increments  
OBSERVE H1, 499.7769920 MHz  
DECOUPLE C13, 125.6803348 MHz  
Power 46 dB  
on during acquisition  
off during delay  
M40\_id modulated  
DATA PROCESSING  
Gauss apodization 0.069 sec  
F1 DATA PROCESSING  
Line broadening 0.3 Hz  
Gauss apodization 0.005 sec  
FT size 4096 x 2048  
Total time 10 hr, 54 min

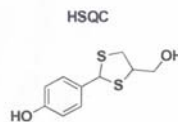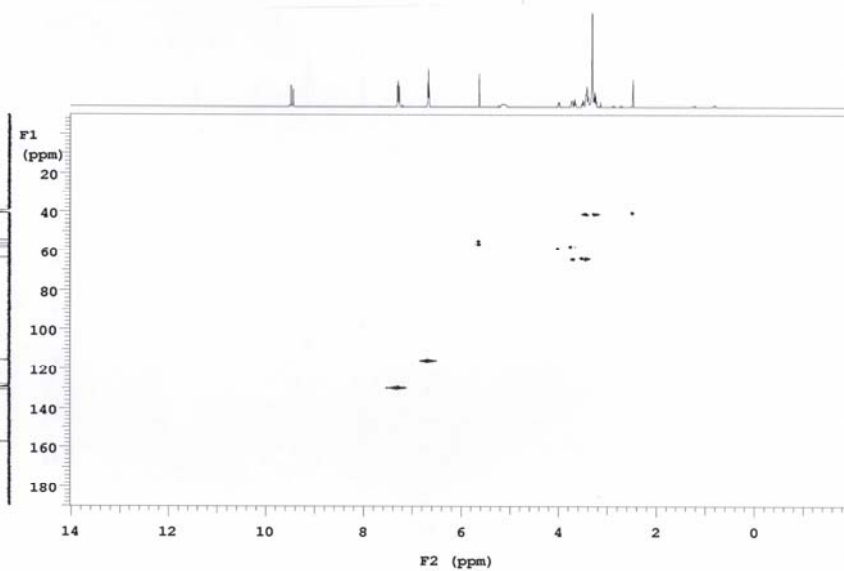

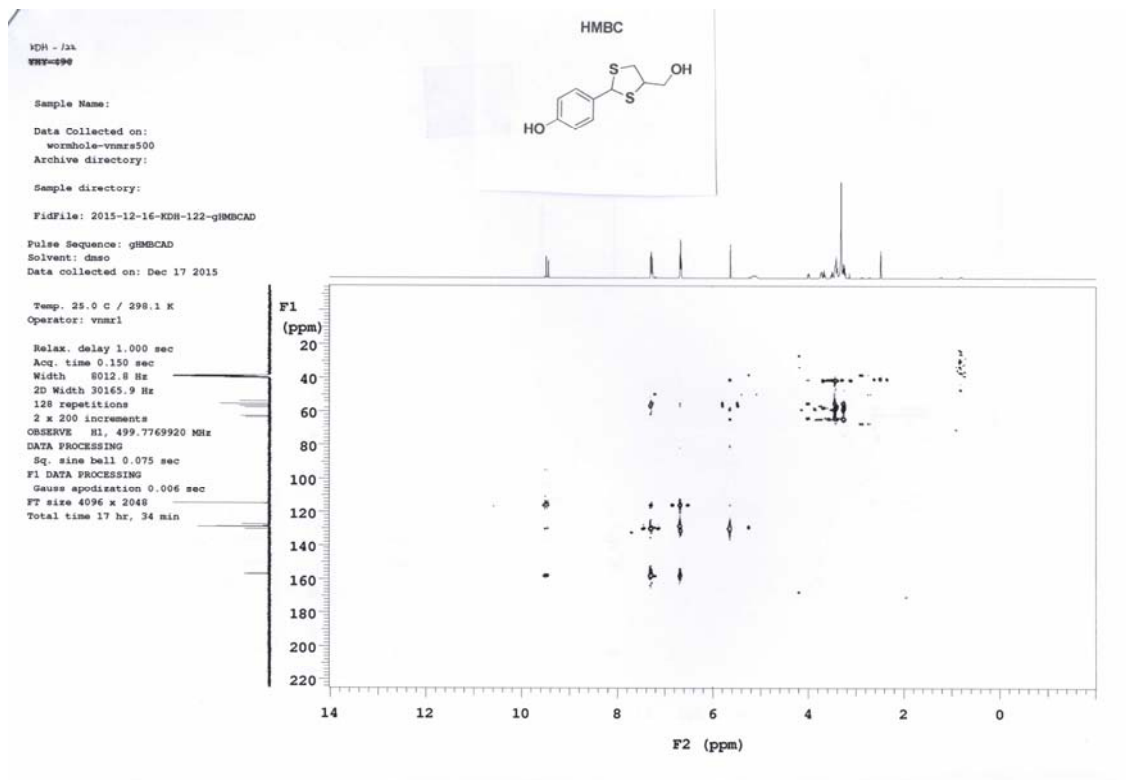

## Images of docking simulation of PDTMs

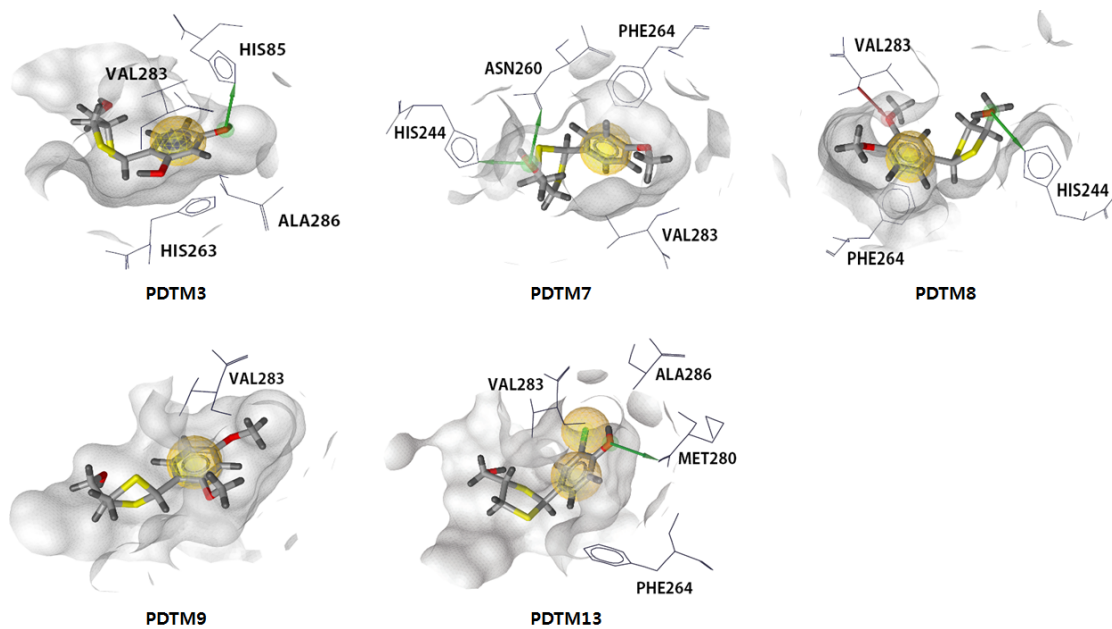

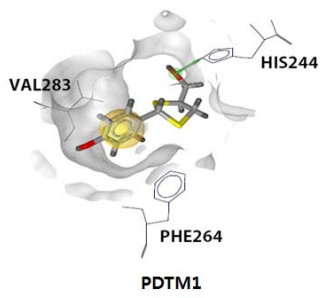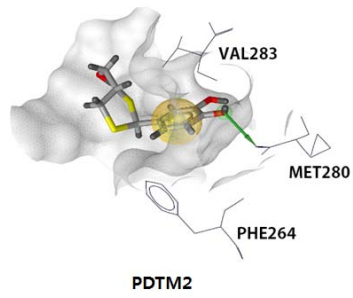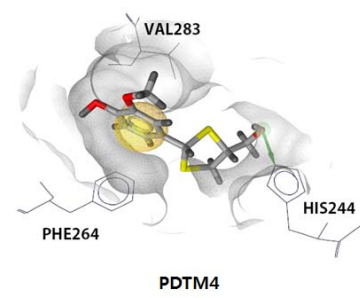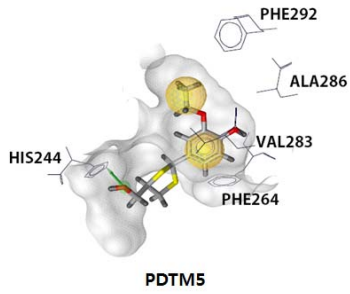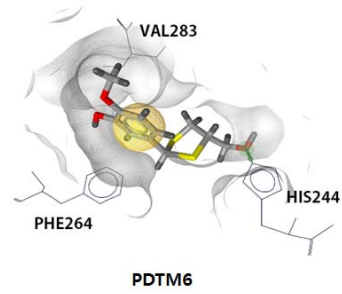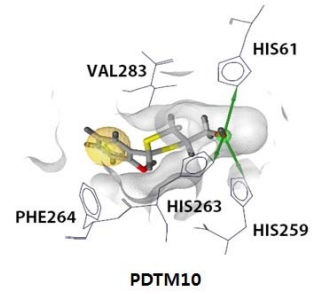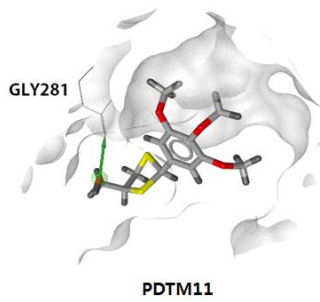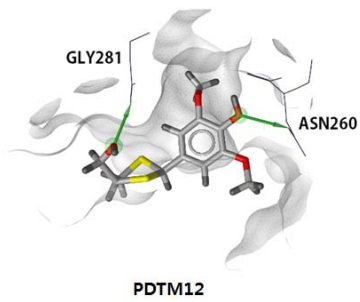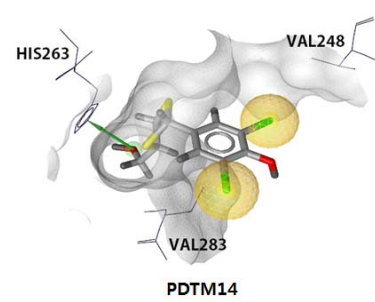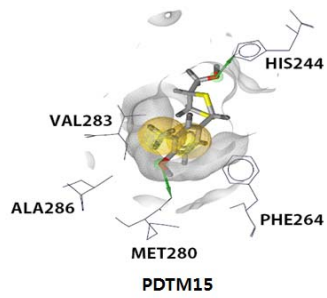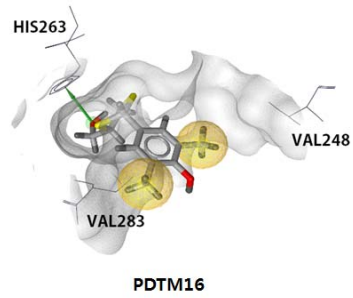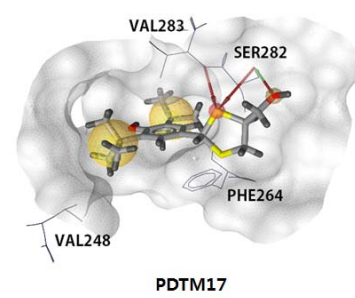

Supplement: Supplementary file 1 [file get_supplementary_file.php]
